# Supplementary material for: Non-randomized mtDNA damage after ionizing radiation via charge transport
Source: PubMed Central journal article supplement — Sci Rep. 2012 Oct 29;2:780. doi: 10.1038/srep00780 (PMC3483021; doi:10.1038/srep00780), 2012-10-29
Supplement: srep00780-s1.pdf [file srep00780-s1.pdf]

# **Non-randomized mtDNA damage after ionizing radiation via charge transport**

**Xin Zhou<sup>1,2,3#</sup>, Xinguo Liu<sup>1,2,3#</sup>, Xin Zhang<sup>1,2,3</sup>, Rong Zhou<sup>1,2,3</sup>, Yang He<sup>1,2,3,4</sup>,  
Qiang Li<sup>1,2,3</sup>, Zhenhua Wang<sup>1,2,3</sup>, Hong Zhang<sup>1,2,3\*</sup>**

1 Institute of Modern Physics, Chinese Academy of Sciences, Lanzhou 730000, China

2 Key laboratory of Heavy Ion Radiation Biology and Medicine Institute of Nuclear Physics, Chinese Academy of Sciences

3 Key laboratory of Heavy-ion Radiation Medicine of Gansu Province, Lanzhou 730000, China

4 Graduate School of Chinese Academy of Sciences, Beijing 100039, China

# These authors contributed equally to this work.

Correspondence to:

-Hong Zhang, Institute of Modern Physics, Chinese Academy of Sciences, Lanzhou 730000, China, email: [Zhangh@impcas.ac.cn](mailto:Zhangh@impcas.ac.cn)

Table of Contents:

|                                                                                                       |   |
|-------------------------------------------------------------------------------------------------------|---|
| Supplementary 1: Computational scanning of the three-codon motif across the mitochondrial genome..... | 2 |
| Supplementary 2: Software packages information.....                                                   | 6 |

## Supplementary 1: Computational scanning of the three-codon motif across the mitochondrial genome

The 16569 bp mtDNA was divided into 9 sections, each contained an equal number of 1841 bp fragment. The scanning began at position 14898 according to the SLR rt-PCR data. The scanning program was design by C language.

|             |    |             |    |             |    |             |    |
|-------------|----|-------------|----|-------------|----|-------------|----|
| AAA         |    | AAG         |    | ACA         |    | ACG         |    |
| 14898-169   | 44 | 14898-169   | 20 | 14898-169   | 53 | 14898-169   | 15 |
| 170-2010    | 80 | 170-2010    | 46 | 170-2010    | 58 | 170-2010    | 15 |
| 2011-3851   | 70 | 2011-3851   | 34 | 2011-3851   | 46 | 2011-3851   | 14 |
| 3852-5692   | 59 | 3852-5692   | 21 | 3852-5692   | 43 | 3852-5692   | 11 |
| 5693-7533   | 44 | 5693-7533   | 22 | 5693-7533   | 41 | 5693-7533   | 11 |
| 7534-9374   | 55 | 7534-9374   | 17 | 7534-9374   | 47 | 7534-9374   | 19 |
| 9375-11215  | 48 | 9375-11215  | 14 | 9375-11215  | 48 | 9375-11215  | 14 |
| 11216-13056 | 47 | 11216-13056 | 18 | 11216-13056 | 55 | 11216-13056 | 11 |
| 13056-14897 | 77 | 13056-14897 | 17 | 13056-14897 | 57 | 13056-14897 | 9  |
| AAC         |    | AAT         |    | AAC         |    | ACT         |    |
| 14898-169   | 41 | 14898-169   | 39 | 14898-169   | 54 | 14898-169   | 37 |
| 170-2010    | 65 | 170-2010    | 35 | 170-2010    | 63 | 170-2010    | 36 |
| 2011-3851   | 64 | 2011-3851   | 38 | 2011-3851   | 61 | 2011-3851   | 35 |
| 3852-5692   | 53 | 3852-5692   | 56 | 3852-5692   | 61 | 3852-5692   | 50 |
| 5693-7533   | 37 | 5693-7533   | 35 | 5693-7533   | 49 | 5693-7533   | 36 |
| 7534-9374   | 56 | 7534-9374   | 47 | 7534-9374   | 62 | 7534-9374   | 49 |
| 9375-11215  | 50 | 9375-11215  | 46 | 9375-11215  | 47 | 9375-11215  | 54 |
| 11216-13056 | 60 | 11216-13056 | 33 | 11216-13056 | 43 | 11216-13056 | 62 |
| 13056-14897 | 69 | 13056-14897 | 47 | 13056-14897 | 75 | 13056-14897 | 53 |
| ATA         |    | ATC         |    | ATG         |    | ATT         |    |
| 14898-169   | 34 | 14898-169   | 53 | 14898-169   | 19 | 14898-169   | 43 |
| 170-2010    | 43 | 170-2010    | 18 | 170-2010    | 16 | 170-2010    | 25 |
| 2011-3851   | 29 | 2011-3851   | 36 | 2011-3851   | 19 | 2011-3851   | 32 |
| 3852-5692   | 56 | 3852-5692   | 45 | 3852-5692   | 17 | 3852-5692   | 31 |
| 5693-7533   | 40 | 5693-7533   | 42 | 5693-7533   | 19 | 5693-7533   | 38 |
| 7534-9374   | 38 | 7534-9374   | 48 | 7534-9374   | 24 | 7534-9374   | 38 |
| 9375-11215  | 43 | 9375-11215  | 42 | 9375-11215  | 17 | 9375-11215  | 52 |
| 11216-13056 | 43 | 11216-13056 | 41 | 11216-13056 | 19 | 11216-13056 | 35 |
| 13056-14897 | 41 | 13056-14897 | 46 | 13056-14897 | 12 | 13056-14897 | 36 |
| CAG         |    | CAT         |    | CCA         |    | CCC         |    |
| 14898-169   | 23 | 14898-169   | 52 | 14898-169   | 54 | 14898-169   | 59 |
| 170-2010    | 29 | 170-2010    | 26 | 170-2010    | 51 | 170-2010    | 79 |
| 2011-3851   | 27 | 2011-3851   | 37 | 2011-3851   | 46 | 2011-3851   | 58 |
| 3852-5692   | 21 | 3852-5692   | 50 | 3852-5692   | 54 | 3852-5692   | 76 |
| 5693-7533   | 23 | 5693-7533   | 47 | 5693-7533   | 43 | 5693-7533   | 61 |
| 7534-9374   | 15 | 7534-9374   | 52 | 7534-9374   | 55 | 7534-9374   | 71 |
| 9375-11215  | 15 | 9375-11215  | 43 | 9375-11215  | 47 | 9375-11215  | 56 |
| 11216-13056 | 24 | 11216-13056 | 57 | 11216-13056 | 49 | 11216-13056 | 76 |
| 13056-14897 | 22 | 13056-14897 | 52 | 13056-14897 | 65 | 13056-14897 | 88 |

|             |    |             |    |             |    |             |    |
|-------------|----|-------------|----|-------------|----|-------------|----|
| CGA         |    | CGC         |    | CGG         |    | CGT         |    |
| 14898-169   | 12 | 14898-169   | 18 | 14898-169   | 11 | 14898-169   | 11 |
| 170-2010    | 17 | 170-2010    | 15 | 170-2010    | 6  | 170-2010    | 10 |
| 2011-3851   | 14 | 2011-3851   | 17 | 2011-3851   | 12 | 2011-3851   | 9  |
| 3852-5692   | 13 | 3852-5692   | 17 | 3852-5692   | 4  | 3852-5692   | 7  |
| 5693-7533   | 15 | 5693-7533   | 14 | 5693-7533   | 18 | 5693-7533   | 17 |
| 7534-9374   | 14 | 7534-9374   | 18 | 7534-9374   | 8  | 7534-9374   | 10 |
| 9375-11215  | 17 | 9375-11215  | 16 | 9375-11215  | 7  | 9375-11215  | 6  |
| 11216-13056 | 10 | 11216-13056 | 16 | 11216-13056 | 8  | 11216-13056 | 6  |
| 13056-14897 | 10 | 13056-14897 | 24 | 13056-14897 | 6  | 13056-14897 | 2  |
| CTG         |    | CTT         |    | GAA         |    | GAC         |    |
| 14898-169   | 18 | 14898-169   | 39 | 14898-169   | 15 | 14898-169   | 22 |
| 170-2010    | 19 | 170-2010    | 32 | 170-2010    | 30 | 170-2010    | 18 |
| 2011-3851   | 22 | 2011-3851   | 29 | 2011-3851   | 27 | 2011-3851   | 18 |
| 3852-5692   | 17 | 3852-5692   | 40 | 3852-5692   | 26 | 3852-5692   | 16 |
| 5693-7533   | 30 | 5693-7533   | 35 | 5693-7533   | 29 | 5693-7533   | 22 |
| 7534-9374   | 20 | 7534-9374   | 35 | 7534-9374   | 19 | 7534-9374   | 21 |
| 9375-11215  | 19 | 9375-11215  | 40 | 9375-11215  | 22 | 9375-11215  | 14 |
| 11216-13056 | 20 | 11216-13056 | 37 | 11216-13056 | 14 | 11216-13056 | 19 |
| 13056-14897 | 15 | 13056-14897 | 32 | 13056-14897 | 19 | 13056-14897 | 19 |
| GCA         |    | GCC         |    | GCG         |    | GCT         |    |
| 14898-169   | 24 | 14898-169   | 32 | 14898-169   | 6  | 14898-169   | 15 |
| 170-2010    | 29 | 170-2010    | 25 | 170-2010    | 11 | 170-2010    | 27 |
| 2011-3851   | 24 | 2011-3851   | 30 | 2011-3851   | 10 | 2011-3851   | 16 |
| 3852-5692   | 26 | 3852-5692   | 26 | 3852-5692   | 1  | 3852-5692   | 20 |
| 5693-7533   | 24 | 5693-7533   | 30 | 5693-7533   | 6  | 5693-7533   | 29 |
| 7534-9374   | 16 | 7534-9374   | 38 | 7534-9374   | 6  | 7534-9374   | 16 |
| 9375-11215  | 15 | 9375-11215  | 36 | 9375-11215  | 6  | 9375-11215  | 17 |
| 11216-13056 | 21 | 11216-13056 | 30 | 11216-13056 | 4  | 11216-13056 | 25 |
| 13056-14897 | 28 | 13056-14897 | 24 | 13056-14897 | 4  | 13056-14897 | 14 |
| GGG         |    | GGT         |    | GTA         |    | GTC         |    |
| 14898-169   | 21 | 14898-169   | 9  | 14898-169   | 26 | 14898-169   | 15 |
| 170-2010    | 9  | 170-2010    | 15 | 170-2010    | 23 | 170-2010    | 11 |
| 2011-3851   | 10 | 2011-3851   | 17 | 2011-3851   | 21 | 2011-3851   | 14 |
| 3852-5692   | 5  | 3852-5692   | 5  | 3852-5692   | 10 | 3852-5692   | 8  |
| 5693-7533   | 7  | 5693-7533   | 13 | 5693-7533   | 22 | 5693-7533   | 15 |
| 7534-9374   | 7  | 7534-9374   | 5  | 7534-9374   | 16 | 7534-9374   | 12 |
| 9375-11215  | 5  | 9375-11215  | 5  | 9375-11215  | 14 | 9375-11215  | 14 |
| 11216-13056 | 7  | 11216-13056 | 8  | 11216-13056 | 15 | 11216-13056 | 11 |
| 13056-14897 | 1  | 13056-14897 | 3  | 13056-14897 | 7  | 13056-14897 | 6  |

|             |    |             |    |             |    |             |    |
|-------------|----|-------------|----|-------------|----|-------------|----|
| TAA         |    | TAC         |    | TAG         |    | TAT         |    |
| 14898-169   | 33 | 14898-169   | 42 | 14898-169   | 23 | 14898-169   | 42 |
| 170-2010    | 57 | 170-2010    | 33 | 170-2010    | 38 | 170-2010    | 23 |
| 2011-3851   | 50 | 2011-3851   | 37 | 2011-3851   | 27 | 2011-3851   | 26 |
| 3852-5692   | 56 | 3852-5692   | 49 | 3852-5692   | 28 | 3852-5692   | 35 |
| 5693-7533   | 32 | 5693-7533   | 34 | 5693-7533   | 30 | 5693-7533   | 44 |
| 7534-9374   | 54 | 7534-9374   | 46 | 7534-9374   | 27 | 7534-9374   | 37 |
| 9375-11215  | 42 | 9375-11215  | 51 | 9375-11215  | 31 | 9375-11215  | 52 |
| 11216-13056 | 43 | 11216-13056 | 43 | 11216-13056 | 30 | 11216-13056 | 37 |
| 13056-14897 | 47 | 13056-14897 | 41 | 13056-14897 | 24 | 13056-14897 | 28 |
| TCG         |    | TCT         |    | TGA         |    | TGC         |    |
| 14898-169   | 14 | 14898-169   | 32 | 14898-169   | 20 | 14898-169   | 16 |
| 170-2010    | 5  | 170-2010    | 18 | 170-2010    | 19 | 170-2010    | 16 |
| 2011-3851   | 11 | 2011-3851   | 32 | 2011-3851   | 22 | 2011-3851   | 13 |
| 3852-5692   | 11 | 3852-5692   | 44 | 3852-5692   | 23 | 3852-5692   | 11 |
| 5693-7533   | 24 | 5693-7533   | 45 | 5693-7533   | 25 | 5693-7533   | 16 |
| 7534-9374   | 10 | 7534-9374   | 30 | 7534-9374   | 24 | 7534-9374   | 18 |
| 9375-11215  | 12 | 9375-11215  | 36 | 9375-11215  | 23 | 9375-11215  | 12 |
| 11216-13056 | 17 | 11216-13056 | 38 | 11216-13056 | 21 | 11216-13056 | 13 |
| 13056-14897 | 17 | 13056-14897 | 32 | 13056-14897 | 13 | 13056-14897 | 8  |
| TTA         |    | TTC         |    | TTG         |    | TTT         |    |
| 14898-169   | 29 | 14898-169   | 37 | 14898-169   | 20 | 14898-169   | 25 |
| 170-2010    | 43 | 170-2010    | 17 | 170-2010    | 13 | 170-2010    | 30 |
| 2011-3851   | 41 | 2011-3851   | 27 | 2011-3851   | 17 | 2011-3851   | 20 |
| 3852-5692   | 40 | 3852-5692   | 35 | 3852-5692   | 9  | 3852-5692   | 25 |
| 5693-7533   | 21 | 5693-7533   | 50 | 5693-7533   | 14 | 5693-7533   | 35 |
| 7534-9374   | 38 | 7534-9374   | 31 | 7534-9374   | 11 | 7534-9374   | 24 |
| 9375-11215  | 50 | 9375-11215  | 34 | 9375-11215  | 16 | 9375-11215  | 57 |
| 11216-13056 | 38 | 11216-13056 | 35 | 11216-13056 | 12 | 11216-13056 | 20 |
| 13056-14897 | 29 | 13056-14897 | 42 | 13056-14897 | 4  | 13056-14897 | 15 |
| AGA         |    | AGG         |    | GGA         |    | GGC         |    |
| 14898-169   | 18 | 14898-169   | 16 | 14898-169   | 18 | 14898-169   | 14 |
| 170-2010    | 35 | 170-2010    | 23 | 170-2010    | 16 | 170-2010    | 14 |
| 2011-3851   | 28 | 2011-3851   | 27 | 2011-3851   | 15 | 2011-3851   | 21 |
| 3852-5692   | 16 | 3852-5692   | 19 | 3852-5692   | 11 | 3852-5692   | 12 |
| 5693-7533   | 18 | 5693-7533   | 29 | 5693-7533   | 28 | 5693-7533   | 25 |
| 7534-9374   | 17 | 7534-9374   | 14 | 7534-9374   | 7  | 7534-9374   | 18 |
| 9375-11215  | 14 | 9375-11215  | 14 | 9375-11215  | 8  | 9375-11215  | 21 |
| 11216-13056 | 18 | 11216-13056 | 15 | 11216-13056 | 6  | 11216-13056 | 17 |
| 13056-14897 | 14 | 13056-14897 | 17 | 13056-14897 | 14 | 13056-14897 | 9  |

|             |    |             |    |             |    |             |    |
|-------------|----|-------------|----|-------------|----|-------------|----|
| AGC         |    | AGT         |    | GTG         |    | GTT         |    |
| 14898-169   | 29 | 14898-169   | 18 | 14898-169   | 4  | 14898-169   | 4  |
| 170-2010    | 47 | 170-2010    | 28 | 170-2010    | 17 | 170-2010    | 16 |
| 2011-3851   | 29 | 2011-3851   | 24 | 2011-3851   | 8  | 2011-3851   | 24 |
| 3852-5692   | 33 | 3852-5692   | 15 | 3852-5692   | 2  | 3852-5692   | 13 |
| 5693-7533   | 34 | 5693-7533   | 16 | 5693-7533   | 8  | 5693-7533   | 12 |
| 7534-9374   | 22 | 7534-9374   | 16 | 7534-9374   | 4  | 7534-9374   | 7  |
| 9375-11215  | 25 | 9375-11215  | 20 | 9375-11215  | 6  | 9375-11215  | 8  |
| 11216-13056 | 34 | 11216-13056 | 16 | 11216-13056 | 5  | 11216-13056 | 13 |
| 13056-14897 | 29 | 13056-14897 | 8  | 13056-14897 | 1  | 13056-14897 | 7  |
| CAA         |    | CAC         |    | TCA         |    | TCC         |    |
| 14898-169   | 52 | 14898-169   | 54 | 14898-169   | 50 | 14898-169   | 56 |
| 170-2010    | 59 | 170-2010    | 56 | 170-2010    | 32 | 170-2010    | 16 |
| 2011-3851   | 59 | 2011-3851   | 37 | 2011-3851   | 45 | 2011-3851   | 30 |
| 3852-5692   | 48 | 3852-5692   | 47 | 3852-5692   | 42 | 3852-5692   | 45 |
| 5693-7533   | 33 | 5693-7533   | 44 | 5693-7533   | 40 | 5693-7533   | 37 |
| 7534-9374   | 47 | 7534-9374   | 54 | 7534-9374   | 49 | 7534-9374   | 43 |
| 9375-11215  | 46 | 9375-11215  | 49 | 9375-11215  | 43 | 9375-11215  | 42 |
| 11216-13056 | 54 | 11216-13056 | 49 | 11216-13056 | 59 | 11216-13056 | 44 |
| 13056-14897 | 67 | 13056-14897 | 64 | 13056-14897 | 55 | 13056-14897 | 48 |
| CCG         |    | CCT         |    | TGG         |    | TGT         |    |
| 14898-169   | 18 | 14898-169   | 70 | 14898-169   | 14 | 14898-169   | 11 |
| 170-2010    | 16 | 170-2010    | 37 | 170-2010    | 16 | 170-2010    | 14 |
| 2011-3851   | 17 | 2011-3851   | 58 | 2011-3851   | 14 | 2011-3851   | 17 |
| 3852-5692   | 18 | 3852-5692   | 60 | 3852-5692   | 5  | 3852-5692   | 6  |
| 5693-7533   | 23 | 5693-7533   | 50 | 5693-7533   | 19 | 5693-7533   | 11 |
| 7534-9374   | 15 | 7534-9374   | 73 | 7534-9374   | 8  | 7534-9374   | 8  |
| 9375-11215  | 14 | 9375-11215  | 64 | 9375-11215  | 13 | 9375-11215  | 11 |
| 11216-13056 | 8  | 11216-13056 | 60 | 11216-13056 | 8  | 11216-13056 | 14 |
| 13056-14897 | 12 | 13056-14897 | 70 | 13056-14897 | 3  | 13056-14897 | 8  |
| CTA         |    | CTC         |    | GAG         |    | GAT         |    |
| 14898-169   | 50 | 14898-169   | 47 | 14898-169   | 15 | 14898-169   | 16 |
| 170-2010    | 42 | 170-2010    | 25 | 170-2010    | 20 | 170-2010    | 18 |
| 2011-3851   | 50 | 2011-3851   | 41 | 2011-3851   | 20 | 2011-3851   | 15 |
| 3852-5692   | 63 | 3852-5692   | 54 | 3852-5692   | 13 | 3852-5692   | 8  |
| 5693-7533   | 56 | 5693-7533   | 39 | 5693-7533   | 22 | 5693-7533   | 13 |
| 7534-9374   | 72 | 7534-9374   | 41 | 7534-9374   | 10 | 7534-9374   | 12 |
| 9375-11215  | 69 | 9375-11215  | 43 | 9375-11215  | 13 | 9375-11215  | 13 |
| 11216-13056 | 57 | 11216-13056 | 71 | 11216-13056 | 11 | 11216-13056 | 11 |
| 13056-14897 | 64 | 13056-14897 | 58 | 13056-14897 | 5  | 13056-14897 | 8  |

## **Supplementary 2: Software packages information**

The software packages used for motif scanning and counting triple G abundance ratio are now available via the following links:

<https://www.box.com/s/ko5isfqivkvnc0yn0j38>

<https://www.box.com/s/puos4djay7evpr8bzbv52>

The software packages are RAR files. The packages consist of an executable file, a sample file/directory and a readme file for notification.
